# Supplementary material
Source: Research Square preprint supplement (doi:10.21203/rs.3.rs-8896078/v1)
Supplement: Supplementary file 1 [file 4ab33c61031d8ec11c6a3e27.docx]

**Patient Simulation 1**

**Narrator:** “Josh is a 20-year-old gay man coming in for an STI test. He is in a monogamous relationship with his boyfriend, but he still likes to get routine STI tests to be safe.”

**Segment 1**

**Provider:** “Hi Josh, my name is ____, and I’m going to be your provider today.”

**End Scene**

**Narrator:** “Be sure to introduce yourself with pronouns and ask patients for their pronouns as well.”

**Segment 2**

**Provider:** “Hi Josh, my name is ______, I use ___/___ pronouns, and I’m going to be your provider today. Just before I begin, I wanted to ask what your pronouns are?”

**Josh:** “I use he/him pronouns, thank you for asking.”

**Provider:** “What brings you in today?”

**Josh:** “I was hoping to have an STI test done today.”

**Provider:** “Sounds good, is it okay if we start with going over your sexual history?”

**Josh:** “Yeah, that works.”

**Provider:** “Great. Are you sexually active, and if so, how many women have you been with in the past three months?”

**End Scene**

**Narrator:** “It is important for providers to not assume the sexual orientation and behavior of their patients. Heteronormative language can be extremely isolating for patients who engage in same-sex relationships. Here is an example of an apology from a provider after making such an assumption.”

**Segment 3**

**Josh:** “Actually, I have just been with my boyfriend.”

**Provider:** “I apologize, I shouldn’t have made that assumption.”

**Provider:** “Okay, so you and your friend are having penetrative sex, I’m assuming?”

**End scene**

**Narrator:** “As a provider, you should not be making assumptions about your patient’s sexual history and practices. This can make your patients extremely uncomfortable, regardless of their sexual orientation. It is also important to not disregard a person’s partner if they are the same sex. Same-sex partners are often not recognized by healthcare providers.”

**Segment 4**

**Provider:** “Okay, then just one person in the past three months?”

**Josh:** “That is correct.”

**Provider:** “Thank you for letting me know. Are you aware of the risks and options on protective measures such as condoms or PrEP?”

**Josh:** “Yes, I’m aware, thanks for asking.”

**Provider:** “Okay sounds good, let’s take you to the lab to get some tests done.”

**End scene**

**Patient Simulation 2**

**Narrator:** “Tyler is a 21-year-old man assigned-female-at-birth (AFAB). Tyler comes in for a routine pelvic exam. This is his first time at a primary care clinic.”

**Segment 1**

**Provider:** “Hi, Tyler, my name is ______, I use ___/___ pronouns, and I’m going to be your provider today. Just before I begin, I wanted to ask what your pronouns are?”

**Tyler:** “I use he/him, thanks for asking.”

**Provider:** “What brings you in today?”

**Tyler:** “I’m here for a pelvic exam.”

**Provider:** “Oh, so you’re here for a well-woman visit?”

**End scene**

**Narrator:** “Now, what could the provider have said differently here to promote a more inclusive environment?”

**Segment 2**

**Provider:** “Okay, sounds good. Let’s do a pelvic exam. Before we start, is it okay if we have a quick conversation about your sexual history?”

**Tyler:** “Yes, that’s fine.”

**Provider:** “Perfect. Are you only having sex with women?”

**End scene**

**Narrator:** “Tyler is transgender, but gender identity does not equate to sexual orientation. The provider needs to be inclusive when taking sexual histories.”

**Segment 3**

**Provider:** “Perfect. Are you sexually active, and if so, what parts do your partners have?”

**Tyler:** “I have sex with people with penises and vaginas.”

**Provider:** “Thank you for letting me know. Are you using any contraceptives or forms of protection against STIs and HIV?”

**Tyler:** “I always use protection when I have sex.”

**Provider:** “I see. And would you be comfortable sharing what kinds of protection you use? Such as condoms or other physical barriers?”

**Tyler:** “Yes, I always use condoms.”

**Provider:** “Okay, thank you for sharing that with me. And are you by chance on birth control?”

**Tyler:** “No, I’m not.”

**Provider:** “Thank you. Are you on any gender-affirming hormone therapies, such as testosterone?”

**Tyler:** “No, I’m not on any gender-affirming hormone therapies.”

**Provider:** “Okay, thank you so much for sharing all that information with me. We can start with the pelvic exam now. Have you had any difficulty in having a pelvic exam before? Would you like there to be a medical chaperone for the exam?”

**Tyler**: “No.”

**End scene**

**Narrator:** “After the pelvic exam, Tyler goes to check-out.”

**Segment 4**

**Check-out staff:** “Hi there, what’s your first and last name?”

**Tyler:** “Hi, my name is Tyler Smith.”

**End scene**

**Narrator:** “The staff member is not able to find the medical records of ‘Tyler Smith’ in the system. What should the staff member say to Tyler to resolve this issue?”

**Possible responses:**

1. “Hmm, I don’t see ‘Tyler Smith’ in our records. What is your real name?”
2. “Hmm, I don’t see ‘Tyler Smith’ in our records. What is your legal name?”
3. “Hmm, I don’t see ‘Tyler Smith’ in our records. Could there be another name that your records may be under?”

**Narrator:** “It would be most appropriate to ask Tyler if his records could be under a different name. Asking for ‘real names’ or ‘legal names’ can cause discomfort for patients who go by a different name.”

**Segment 5**

**Check-out staff:** “Hmm, I don’t see ‘Tyler Smith’ in our records. Could there be another name that your records may be under?”

**Tyler:** “Yes, it might be under ‘Rebecca Smith.’”

**Check-out staff.** “Thank you, I see that now. You’re all good to go today.”

**End scene**
