# Supplementary material
Source: Research Square preprint supplement (doi:10.21203/rs.3.rs-8896078/v1)
Supplement: Supplementary file 2 [file a3b29eef79f12ccaa472c69a.docx]

**References**

1. Alex S. Keuroghlian, Sari L. Reisner, Jaclyn M. White, Roger D. Weiss. Substance use and treatment of substance use disorders in a community sample of transgender adults. Drug and Alcohol Dependence; Volume 152, 2015, Pages 139-146, ISSN 0376-8716. https://doi.org/10.1016/j.drugalcdep.2015.04.008. https://www.sciencedirect.com/science/article/pii/S0376871615002033
2. American Psychiatric Association. (2017). *Mental Health Disparities: LGBTQ*. American Psychiatric Association. Retrieved April 6, 2024, from https://www.psychiatry.org/File%20Library/Psychiatrists/Cultural-Competency/Mental-Health-Disparities/Mental-Health-Facts-for-LGBTQ.pdf
3. *APA Dictionary of Psychology*. (2023, November 15). APA Dictionary of Psychology. Retrieved April 6, 2024, from https://dictionary.apa.org/gender-dysphoria
4. Breast Augmentation. (n.d.). Boston Children's Hospital. Retrieved April 6, 2024, from https://www.childrenshospital.org/treatments/breast-augmentation
5. Centers for Disease Control and Prevention. HIV Surveillance Report, 2021; vol. 34. http://www.cdc.gov/hiv/library/reports/hiv-surveillance.html. Published May 2023. Accessed December 2023.
6. Centers for Disease Control and Prevention. HIV Surveillance Report, 2019; vol. 32. http://www.cdc.gov/hiv/library/reports/hiv-surveillance.html. Published May 2021. Accessed April 2024.
7. Chest Reconstruction Surgery | FTM Top Surgery. (n.d.). Denver Health. Retrieved April 6, 2024, from https://www.denverhealth.org/services/lgbtq-services/gender-affirming-surgery/chest-reconstruction-surgery
8. Deutsch, M. B. (2016, June 17). *Binding, packing, and tucking | Gender Affirming Health Program*. UCSF Transgender Care. Retrieved April 6, 2024, from https://transcare.ucsf.edu/guidelines/binding-packing-and-tucking
9. Dreger, A. (2013, December 1). *Implementing Curricular and Institutional Climate Changes to Improve Health Care for Individuals Who are LGBT, Gender Nonconforming, or Born with DSD: A Resource for Medical Educators*. AAMC. Retrieved April 6, 2024, from https://store.aamc.org/downloadable/download/sample/sample_id/129/
10. Dirmann, J. (2021, June 14). *,*. , - YouTube. Retrieved April 6, 2024, from https://www.thelancet.com/journals/lanhiv/article/PIIS2352-3018(21)00108-9/fulltext
11. Erin Wingo, Natalie Ingraham, Sarah C.M. Roberts, Reproductive Health Care Priorities and Barriers to Effective Care for LGBTQ People Assigned Female at Birth: A Qualitative Study. Women's Health Issues; Volume 28, Issue 4, 2018, Pages 350-357. ISSN 1049-3867. https://doi.org/10.1016/j.whi.2018.03.002.
12. Facial Masculinization Surgery: What Is It, Procedure & Recovery. (2021, August 24). Cleveland Clinic. Retrieved April 6, 2024, from https://my.clevelandclinic.org/health/treatments/21713-facial-masculinization-surgery
13. *Gender-Affirming Hormone Therapy*. (n.d.). Duke Health. Retrieved April 6, 2024, from https://www.dukehealth.org/treatments/adult-gender-medicine/gender-affirming-hormone-therapy
14. *Gender-affirming (transgender) voice therapy and surgery*. (n.d.). Mayo Clinic. Retrieved April 6, 2024, from https://www.mayoclinic.org/tests-procedures/transgender-voice-therapy-and-surgery/about/pac-20470545
15. Goldstone S, Palefsky JM, Giuliano AR, Moreira ED Jr, Aranda C, Jessen H, Hillman RJ, Ferris DG, Coutlee F, Liaw KL, Marshall JB, Zhang X, Vuocolo S, Barr E, Haupt RM, Guris D, Garner EI. Prevalence of and risk factors for human papillomavirus (HPV) infection among HIV-seronegative men who have sex with men. J Infect Dis. 2011 Jan 1;203(1):66-74. doi: 10.1093/infdis/jiq016. PMID: 21148498; PMCID: PMC3086446.
16. Grant, Jaime M., Lisa A. Mottet, Justin Tanis, Jack Harrison, Jody L. Herman, and Mara Keisling. Injustice at Every Turn: A Report of the National Transgender Discrimination Survey. Washington: National Center for Transgender Equality and National Gay and Lesbian Task Force, 2011.
17. Herbert, T. (n.d.). *The Third Gender and Hijras | Religion and Public Life at Harvard Divinity School*. Religion and Public Life. Retrieved April 6, 2024, from https://rpl.hds.harvard.edu/religion-context/case-studies/gender/third-gender-and-hijras
18. Human Rights Campaign Foundation. (2018). *A Workplace Divided: Understanding the Climate for LGBTQ Workers*. Human Rights Campaign. Retrieved April 6, 2024, from https://www.hrc.org/resources/a-workplace-divided-understanding-the-climate-for-lgbtq-workers-nationwide
19. James, S. E., Herman, J. L., Rankin, S., Keisling, M., Mottet, L., & Anafi, M. (2016). The Report of the 2015 U.S. Transgender Survey. Washington, DC: National Center for Transgender Equality.
20. Kann L, Olsen EO, McManus T, et al. Sexual Identity, Sex of Sexual Contacts, and Health-Related Behaviors Among Students in Grades 9–12 — United States and Selected Sites, 2015. MMWR Surveill Summ 2016;65(No. SS-9):1-202. DOI: http://dx.doi.org/10.15585/mmwr.ss6509a.
21. KFF. (n.d.). *2022 Women's Health Survey*. KFF. Retrieved April 6, 2024, from https://www.kff.org/womens-health-policy/dashboard/2022-womens-health-survey/
22. Leemis R.W., Friar N., Khatiwada S., Chen M.S., Kresnow M., Smith S.G., Caslin, S., & Basile, K.C. (2022). The National Intimate Partner and Sexual Violence Survey: 2016/2017 Report on Intimate Partner Violence. Atlanta, GA: National Center for Injury Prevention and Control, Centers for Disease Control and Prevention.
23. Lenz, K. (2023). Lecture 4: *Sex Determination and Differentiation* [PowerPoint slides.] The Ohio State University Hormones and Behavior CarmenCanvas: https://osu.instructure.com/courses/138542
24. *LGBTQ+ Family Building at Johns Hopkins Fertility Center*. (n.d.). Johns Hopkins Medicine. Retrieved April 6, 2024, from https://www.hopkinsmedicine.org/gynecology-obstetrics/specialty-areas/fertility-center/lgbtq-families
25. Merriam-Webster. (n.d.). *Deadname Definition & Meaning*. Merriam-Webster. Retrieved April 6, 2024, from https://www.merriam-webster.com/dictionary/deadname
26. Mirza, S. A., & Rooney, C. (2018, January 18). *Discrimination Prevents LGBTQ People From Accessing Health Care*. Center for American Progress. Retrieved April 6, 2024, from https://www.americanprogress.org/article/discrimination-prevents-lgbtq-people-accessing-health-care/
27. Moore C; LSSGB; Dukes C. The Value of Identity: Providing Culturally-Responsive Care for LGBTQ+ Patients Through Inclusive Language and Practices. Dela J Public Health. 2019 Jun 27;5(3):6-8. doi: 10.3281/djph.2019.06.003. PMID: 34467034; PMCID: PMC8389765.
28. National LGBTQIA+ Health Education Center. (2024, February 29). *LGBTQIA+ Glossary of Terms for Health Care Teams*. LGBTQIA+ Health Education. https://www.lgbtqiahealtheducation.org/glossary/
29. Obedin-Maliver J, Goldsmith ES, Stewart L, et al. Lesbian, Gay, Bisexual, and Transgender–Related Content in Undergraduate Medical Education. *JAMA.* 2011;306(9):971–977. doi:10.1001/jama.2011.1255
30. *Orchiectomy: Purpose, Procedure, Risks & Recovery*. (2024, January 24). Cleveland Clinic. Retrieved April 6, 2024, from https://my.clevelandclinic.org/health/procedures/orchiectomy
31. *Patient-Centered Care | For Health Care Providers | Transforming Health | Clinicians | HIV | CDC*. (n.d.). Centers for Disease Control and Prevention. Retrieved April 6, 2024, from https://www.cdc.gov/hiv/clinicians/transforming-health/health-care-providers/affirmative-care.html#strategies
32. *Penectomy: Purpose, Procedure, Results & Recovery*. (2022, April 6). Cleveland Clinic. Retrieved April 6, 2024, from https://my.clevelandclinic.org/health/treatments/22806-penectomy
33. *PEP | HIV Basics | HIV/AIDS | CDC*. (n.d.). Centers for Disease Control and Prevention. Retrieved April 6, 2024, from https://www.cdc.gov/hiv/basics/pep.html
34. *Phalloplasty for Gender Affirmation*. (n.d.). Johns Hopkins Medicine. Retrieved April 6, 2024, from https://www.hopkinsmedicine.org/health/treatment-tests-and-therapies/phalloplasty-for-gender-affirmation
35. *PrEP | HIV Basics | HIV/AIDS | CDC*. (n.d.). Centers for Disease Control and Prevention. Retrieved April 6, 2024, from https://www.cdc.gov/hiv/basics/prep.html
36. *Reciprocal IVF*. (n.d.). UCSF Center for Reproductive Health. Retrieved April 6, 2024, from https://crh.ucsf.edu/fertility-treatment/reciprocal-ivf
37. Sturm A, Chaiet SR. Chondrolaryngoplasty-Thyroid Cartilage Reduction. Facial Plast Surg Clin North Am. 2019 May;27(2):267-272. doi: 10.1016/j.fsc.2019.01.005. PMID: 30940393.
38. Substance Abuse and Mental Health Services Administration. 2020 National Survey on Drug Use and Health: Lesbian, Gay, & Bisexual (LGB) Adults (Annual Report). samhsa.gov. <https://www.samhsa.gov/data/report/2020-nsduh-lesbian-gay-bisexual-lgb-adults> Published July 22, 2022. Accessed February 7, 2023.
39. Tamargo CL, Quinn GP, Sanchez JA, Schabath MB. Cancer and the LGBTQ Population: Quantitative and Qualitative Results from an Oncology Providers' Survey on Knowledge, Attitudes, and Practice Behaviors. J Clin Med. 2017 Oct 7;6(10):93. doi: 10.3390/jcm6100093. PMID: 28991160; PMCID: PMC5664008.
40. Waterman, Lindsay MN, ARNP; Voss, Joachim PhD, RN, ACRN, FAAN. HPV, cervical cancer risks, and barriers to care for lesbian women. The Nurse Practitioner 40(1):p 46-53, January 16, 2015. | DOI: 10.1097/01.NPR.0000457431.20036.5c
41. Wilson, B. D.M., Choi, S. K., & Harper, G. W. (2020, May). *Homelessness Among LGBT Adults in the US*. Williams Institute. Retrieved April 6, 2024, from https://williamsinstitute.law.ucla.edu/publications/lgbt-homelessness-us/
42. Thompson MA, Horberg MA, Agwu AL, Colasanti JA, Jain MK, Short WR, Singh T, Aberg JA. Primary Care Guidance for Persons With Human Immunodeficiency Virus: 2020 Update by the HIV Medicine Association of the Infectious Diseases Society of America. Clin Infect Dis. 2021 Dec 6;73(11):e3572-e3605. doi: 10.1093/cid/ciaa1391. Erratum in: Clin Infect Dis. 2021 Dec 08;: Erratum in: Clin Infect Dis. 2022 Nov 30;75(11):2052. PMID: 33225349.
43. *2013 National Health Interview Survey (NHIS) Public Use Data Release: Survey Description.* Hyattsville, MD: National Center for Health Statistics; 2024. https://www.cdc.gov/nchs/nhis/nhis_2013_data_release.htm
