# Supplementary material
Source: Research Square preprint supplement (doi:10.21203/rs.3.rs-8896078/v1)
Supplement: Supplementary file 3 [file d3a0fa322852f5dc13b8de44.docx]

**Pre- and Post-Program Survey Questions**

**ID Number**

1. What are the last 3 digits of your phone number, and the first 2 letters of the street you live on? Please respond in the format XXX-XX.

**Implicit Bias**

1. What was the result of your implicit bias score between straight and gay people?
   1. Strong automatic preference for straight people compared to gay people
   2. Moderate automatic preference for straight people compared to gay people
   3. slight automatic preference for straight people compared to gay people
   4. Little to no automatic preference between gay and straight people
   5. Slight automatic preference for gay people compared to straight people
   6. Moderate automatic preference for gay people compared to straight people
   7. Strong automatic preference for gay people compared to straight people
2. What was the result of your implicit bias score between cisgender and transgender people?
   1. Strong automatic preference for cisgender people compared to transgender people
   2. Moderate automatic preference for cisgender people compared to transgender people
   3. slight automatic preference for cisgender people compared to transgender people
   4. Little to no automatic preference between cisgender people and transgender people
   5. Slight automatic preference for transgender people compared to cisgender people
   6. Moderate automatic preference for transgender people compared to cisgender people
   7. Strong automatic preference for transgender people compared to cisgender people

**Sexual Minority**

1. How much prior training and education do you have in the treatment of patients who are sexual minorities (i.e. gay men, lesbian women, bisexuals)?
   1. 0 formal classes or training programs
   2. 1-3 formal classes or training programs
   3. Greater than 4 classes or training programs
2. I am comfortable asking patients who identify as heterosexual about their sexual histories and practices?
   1. Strongly agree
   2. moderately agree
   3. Somewhat agree
   4. Somewhat disagree
   5. Moderately disagree
   6. Strongly disagree
3. I am comfortable asking patients who identify as a sexual minority (i.e. gay men, lesbian women, bisexuals) about their sexual histories and practices?
   1. Strongly agree
   2. moderately agree
   3. Somewhat agree
   4. Somewhat disagree
   5. Moderately disagree
   6. Strongly disagree
4. I am comfortable addressing risk reduction in terms of sexual behavior with patients who identify as heterosexual.
   1. Strongly agree
   2. moderately agree
   3. Somewhat agree
   4. Somewhat disagree
   5. Moderately disagree
   6. Strongly disagree

**Gay men:** A sexual orientation describing men who are primarily emotionally and physically attracted to other individuals identifying as men.

1. I am confident treating patients who identify as gay men?
   1. Strongly agree
   2. moderately agree
   3. Somewhat agree
   4. Somewhat disagree
   5. Moderately disagree
   6. Strongly disagree
2. I am comfortable addressing the specific health needs of patients who identify as gay men?
   1. Strongly agree
   2. moderately agree
   3. Somewhat agree
   4. Somewhat disagree
   5. Moderately disagree
   6. Strongly disagree
3. I am comfortable addressing risk reduction in terms of sexual behavior with patients who identify as gay men?
   1. Strongly agree
   2. moderately agree
   3. Somewhat agree
   4. Somewhat disagree
   5. Moderately disagree
   6. Strongly disagree

**Lesbian women:** Women who are primarily emotionally and physically attracted to other women.

1. I am confident treating patients who identify as lesbian women?
   1. Strongly agree
   2. moderately agree
   3. Somewhat agree
   4. Somewhat disagree
   5. Moderately disagree
   6. Strongly disagree
2. I am comfortable addressing the specific health needs of patients who identify as lesbian women?
   1. Strongly agree
   2. moderately agree
   3. Somewhat agree
   4. Somewhat disagree
   5. Moderately disagree
   6. Strongly disagree
3. I am comfortable addressing risk reduction in terms of sexual behavior with patients who identify as lesbian women?
   1. Strongly agree
   2. moderately agree
   3. Somewhat agree
   4. Somewhat disagree
   5. Moderately disagree
   6. Strongly disagree

**Bisexual:** A sexual orientation that describes a person who is emotionally and physically attracted to women/females and men/males. Some people define bisexuality as attraction to all genders.

1. I am confident treating patients who identify as bisexual?
   1. Strongly agree
   2. moderately agree
   3. Somewhat agree
   4. Somewhat disagree
   5. Moderately disagree
   6. Strongly disagree
2. I am comfortable addressing the specific health needs of patients who identify as bisexual?
   1. Strongly agree
   2. moderately agree
   3. Somewhat agree
   4. Somewhat disagree
   5. Moderately disagree
   6. Strongly disagree
3. I am comfortable addressing risk reduction in terms of sexual behavior with patients who identify as bisexual?
   1. Strongly agree
   2. moderately agree
   3. Somewhat agree
   4. Somewhat disagree
   5. Moderately disagree
   6. Strongly disagree

**Gender Minority**

1. How much prior training and education do you have in the treatment of patients who are gender minorities (i.e. transgender, nonbinary)?
   1. 0 formal classes or training programs
   2. 1-3 formal classes or training programs
   3. Greater than 4 classes or training programs
2. I am comfortable asking patients who identify as a gender minority (i.e. transgender, nonbinary) about their sexual histories and practices?
   1. Strongly agree
   2. moderately agree
   3. Somewhat agree
   4. Somewhat disagree
   5. Moderately disagree
   6. Strongly disagree
3. How often do you ask patients for their pronouns?
   1. Always
   2. Often
   3. Sometimes
   4. Not often
   5. Never
4. I am comfortable asking a patient for their pronouns?
   1. Strongly agree
   2. moderately agree
   3. Somewhat agree
   4. Somewhat disagree
   5. Moderately disagree
   6. Strongly disagree
5. I am comfortable discussing biological sex with patients who identify as a gender minority (i.e. transgender, nonbinary)?
   1. Strongly agree
   2. moderately agree
   3. Somewhat agree
   4. Somewhat disagree
   5. Moderately disagree
   6. Strongly disagree
6. I am comfortable making referrals (i.e. surgical, behavioral health) for gender-affirming care for patients who identify as a gender minority (i.e. transgender, nonbinary)?
   1. Strongly agree
   2. moderately agree
   3. Somewhat agree
   4. Somewhat disagree
   5. Moderately disagree
   6. Strongly disagree
7. I am comfortable prescribing therapies (i.e. gender-affirming hormone therapy) for gender-affirming care for patients who identify as a gender minority (i.e. transgender, nonbinary)?
   1. Strongly agree
   2. moderately agree
   3. Somewhat agree
   4. Somewhat disagree
   5. Moderately disagree
   6. Strongly disagree

**Transgender:** A person whose gender identity and sex assigned at birth do not correspond based on traditional expectations; for example, a person assigned female sex at birth who identifies as a man; or a person assigned male sex at birth who identifies as a woman.

1. I am confident treating patients who identify as transgender?
   1. Strongly agree
   2. moderately agree
   3. Somewhat agree
   4. Somewhat disagree
   5. Moderately disagree
   6. Strongly disagree
2. I am comfortable addressing the specific health needs of patients who identify as transgender?
   1. Strongly agree
   2. moderately agree
   3. Somewhat agree
   4. Somewhat disagree
   5. Moderately disagree
   6. Strongly disagree

**Nonbinary:** A person whose gender identity falls outside of the traditional gender binary structure of girl/woman and boy/man.

1. I am confident treating patients who identify as nonbinary?
   1. Strongly agree
   2. moderately agree
   3. Somewhat agree
   4. Somewhat disagree
   5. Moderately disagree
   6. Strongly disagree
2. I am comfortable addressing the specific health needs of patients who identify as nonbinary?
   1. Strongly agree
   2. moderately agree
   3. Somewhat agree
   4. Somewhat disagree
   5. Moderately disagree
   6. Strongly disagree

**Gender fluid:** A person whose gender identity is not fixed. A person who is gender fluid may always feel like a mix of more than one gender, but may feel more aligned with a certain gender some of the time, another gender at other times, both genders sometimes, and sometimes no gender at all.

1. I am confident treating patients who identify as gender fluid?
   1. Strongly agree
   2. moderately agree
   3. Somewhat agree
   4. Somewhat disagree
   5. Moderately disagree
   6. Strongly disagree
2. I am comfortable addressing the specific health needs of patients who identify as gender fluid?
   1. Strongly agree
   2. moderately agree
   3. Somewhat agree
   4. Somewhat disagree
   5. Moderately disagree
   6. Strongly disagree

**Knowledge Check**

1. In the United States, what percent of transgender patients have been refused care by their provider as a result of their gender identity?
   1. 11-15%
   2. 16-20%
   3. 21-25%
   4. **26-30%**
2. What kind of cancer are women who identify as lesbian more vulnerable to?
   1. **Cervical cancer**
   2. Lung cancer
   3. Leukemia
   4. Lymphoma
3. The LGBTQ+ community has the greatest rates of _____?
   1. **Tobacco, alcohol, and substance abuse disorders**
   2. Homelessness
   3. Victimhood of violent crimes
   4. Poverty
4. What disorder can lead to XX individuals identifying more often as men?
   1. 5-alpha-dehydrogenase deficiency
   2. Androgen insensitivity syndrome
   3. **Congenital adrenal hyperplasia**
   4. Turner’s syndrome
5. What is the difference between sexual orientation and gender identity?
   1. They are the same
   2. Sexual orientation refers to how people describe their emotional and sexual attraction to others, while gender identity refers to the genitalia someone was born with.
   3. **Sexual orientation refers to how people describe their emotional and sexual attraction to others, while gender identity refers to a person’s innate feeling of being male, female, or outside of the gender binary.**
   4. Sexual orientation refers to the genitalia someone was born with, while gender identity refers to a person’s innate feeling of being male, female, or outside of the gender binary

**Demographics**

1. How would you identify your racial background? Select all that apply.
   1. White/Caucasian
   2. African American
   3. Asian
   4. Native American
   5. Native Hawaiian or Pacific Islander
   6. Other (please specify)
   7. Prefer not to say
2. How would you identify your ethnic background?
   1. Hispanic or Latino
   2. Not Hispanic or Latino
   3. Prefer not to say
3. What is your age?
   1. 18-24 years old
   2. 25-34 years old
   3. 35-44 years old
   4. 45-54 years old
   5. 55-64 years old
   6. 65+ years old
   7. Prefer not to say
4. How would you identify your sexual orientation?
   1. Heterosexual
   2. Homosexual
   3. Bisexual
   4. Asexual
   5. Fluid
   6. Pansexual
   7. Queer
   8. unsure/questioning
   9. Prefer not to say
5. What is your gender identity?
   1. Cisgender male
   2. Cisgender female
   3. FTM transgender
   4. MTF transgender
   5. Nonbinary
   6. Gender fluid
   7. Unsure/questioning
   8. Prefer not to say
